# Supplementary material for: Concentration-tailored interphase engineering in solid-state polymer electrolytes for high-voltage lithium metal batteries
Source: Royal Society of Chemistry journal article supplement (doi:10.1039/d5ta07509b), 2026-01-01
Supplement: d5ta07509b1.pdf [file d5ta07509b1.pdf]

## SUPPORTING INFORMATION

### **Concentration-Tailored Interphase Engineering in Solid-State Polymer Electrolytes for High-Voltage Lithium Metal Batteries**

*Honghui Peng<sup>1</sup>, Dong Liu<sup>1</sup>, Zian Wang<sup>1</sup>, Libao Chen<sup>1</sup>, Chunxiao Zhang<sup>1</sup>, Kunyun Yan<sup>1</sup>,*

*<sup>\*</sup>, Jialin Lin<sup>1</sup>, <sup>\*</sup> and Weifeng Wei<sup>1</sup>*

<sup>1</sup> State Key Laboratory of Powder Metallurgy, Central South University, Changsha, Hunan, P. R. China, 410083

E-mail: [213307003@csu.edu.cn](mailto:213307003@csu.edu.cn) (J. Lin)

[kunyun0206@163.com](mailto:kunyun0206@163.com) (K. Yan)

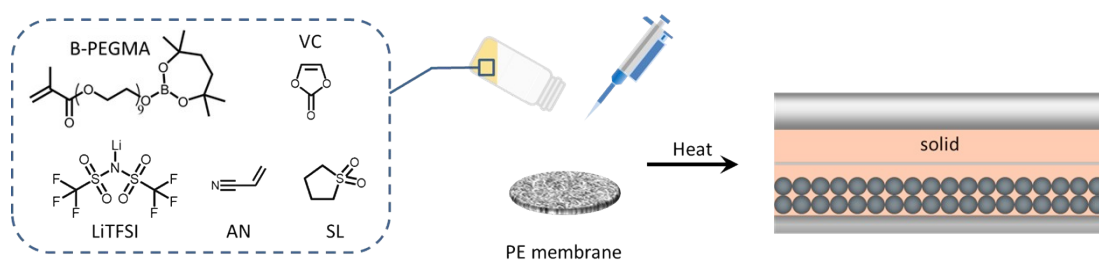

**Figure S1.** In-situ Polymerization Solid-State Battery Fabrication Mechanism Diagram.

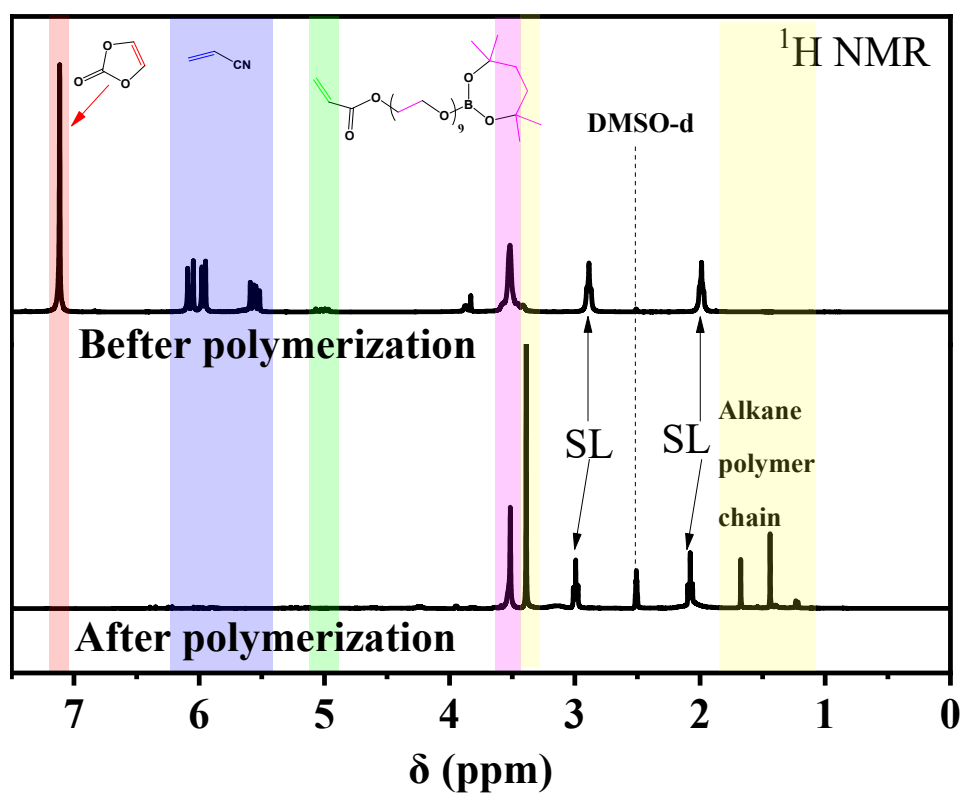

**Figure S2.** The  $^1\text{H}$ -NMR spectra of the electrolyte before and after polymerization.

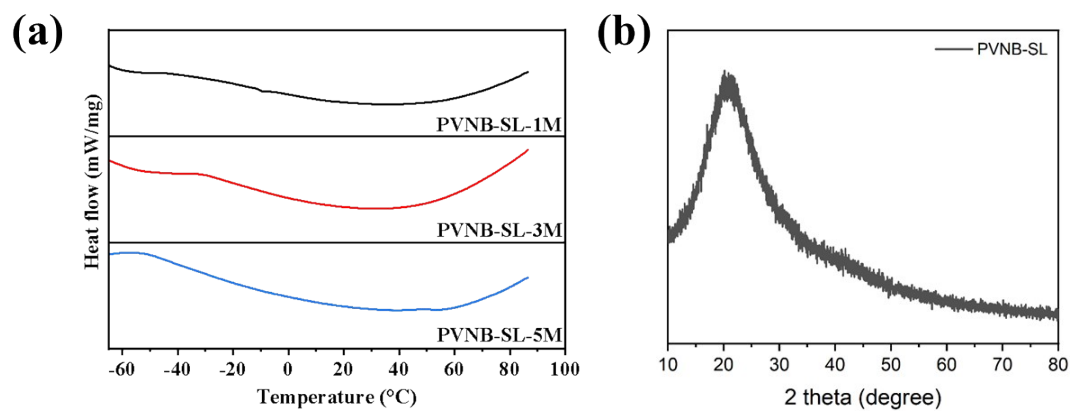

**Figure S3.** (a) The DSC curves of PVNB-SL electrolytes with varying lithium salt concentrations. (b) XRD spectrum of PVNB-SL electrolyte membrane.

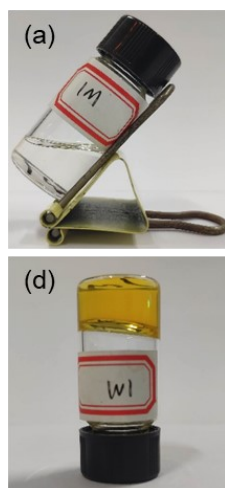

**Figure S4. Optical images of PVNB-SL electrolytes before polymerization and after polymerization.**

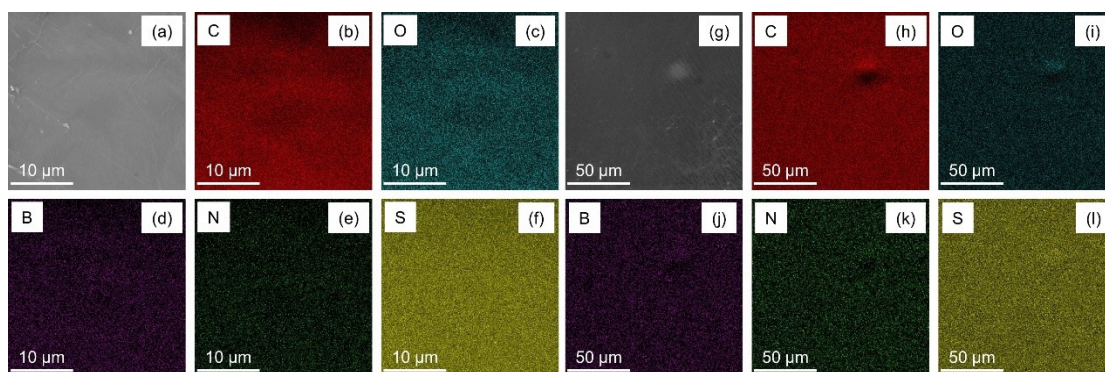

**Figure S5. The SEM images of the (a) surface and (g) interior of the PVNB-SL electrolyte membrane; (b-f) Surface and (h-l) interior EDS mapping of PVNB-SL electrolyte membrane.**

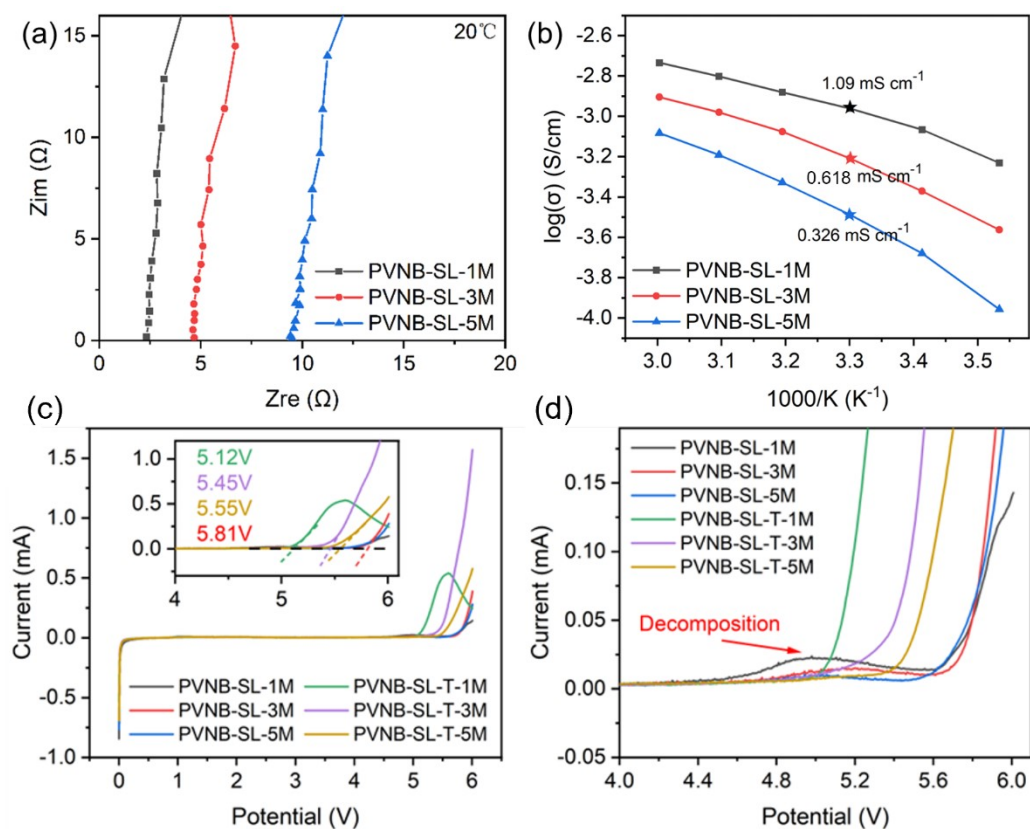

**Figure S6. (a-b) The ionic conductivity of different electrolyte systems. (c) Electrochemical stability window and (d) partial view of electrolytes with different lithium salt concentrations.**

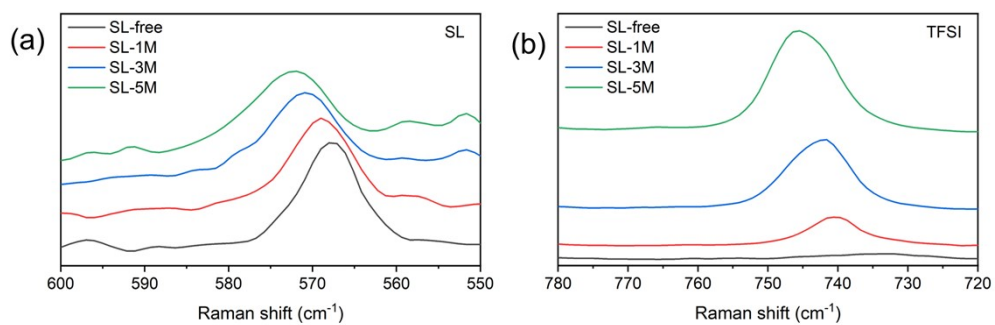

**Figure S7.** Raman spectra of SL solutions with different lithium salt concentrations.



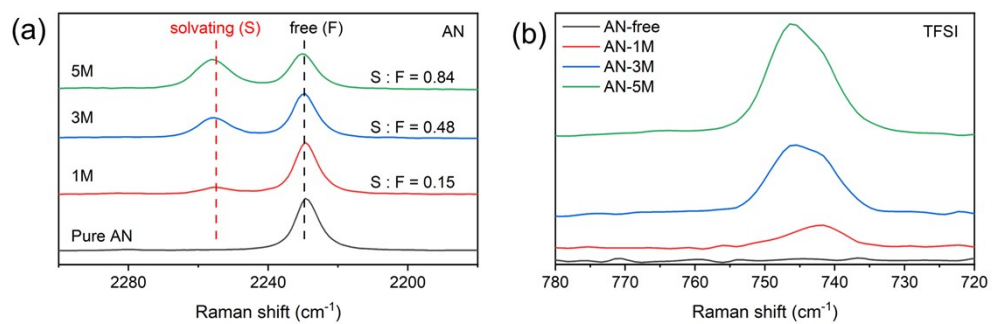

**Figure S8. Raman spectra of AN solutions with varies lithium salt concentrations**

**(a) and (b).**

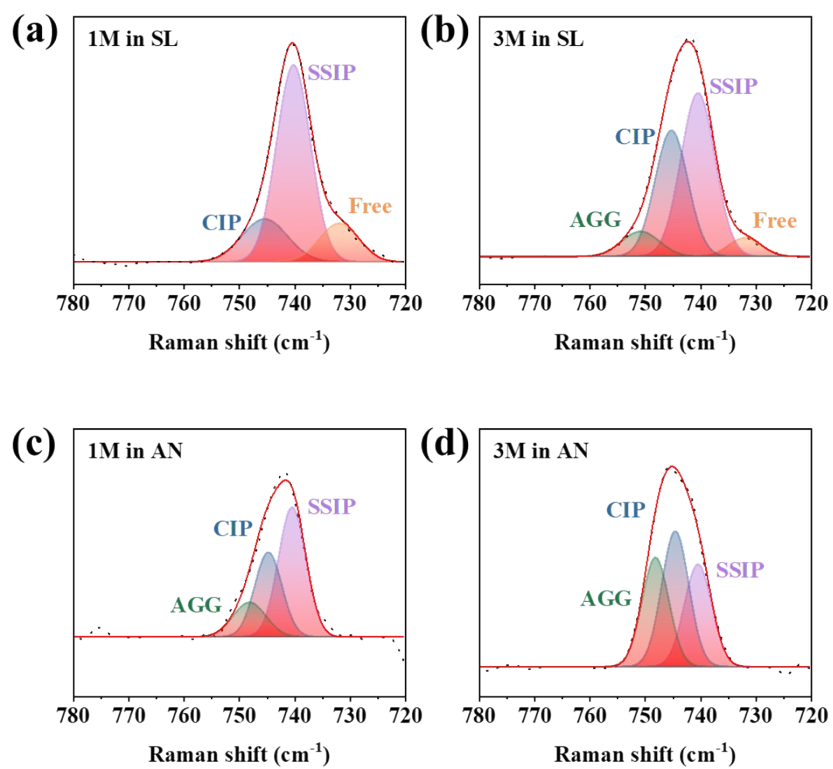

**Figure S9.** Raman spectra of SL/AN solutions with different lithium salt concentrations.

**PVNB-SL-1M**

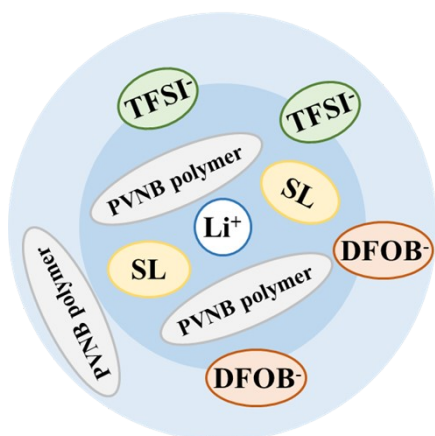

**PVNB-SL-5M**

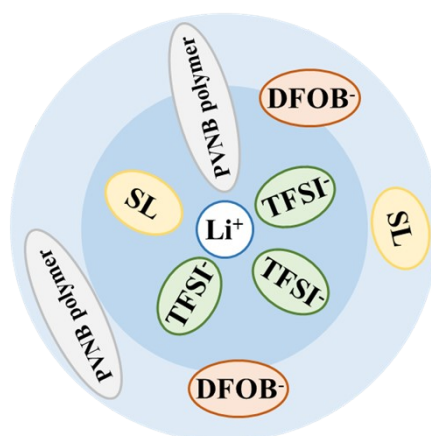

**Figure S10.** The schematic diagram of  $\text{Li}^+$  solvation structure.

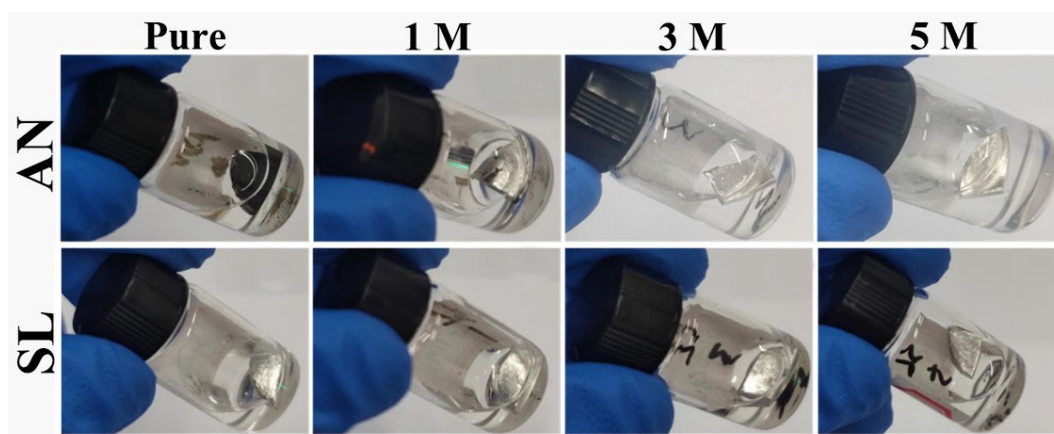

**Figure S11.** Optical photos of Li metal aging in AN and SL with different lithium salt concentrations before aging at 60 °C.

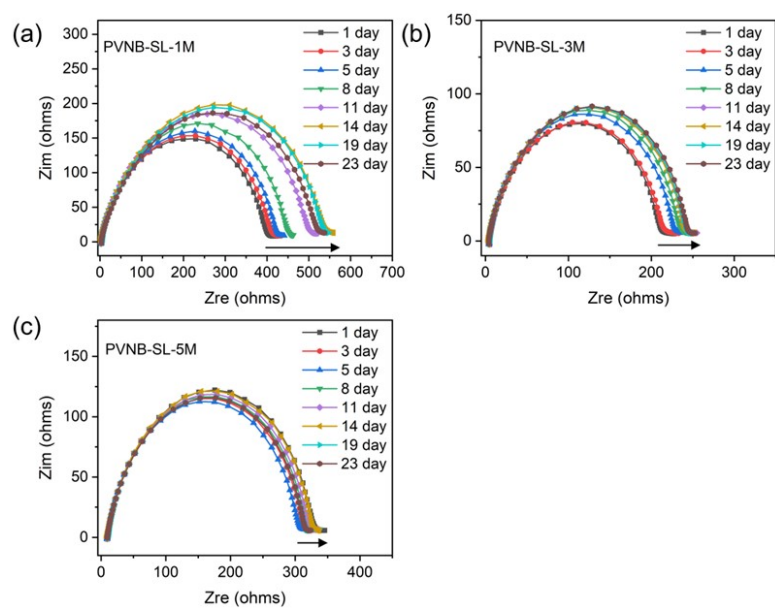

**Figure S12.** Evolution of impedance of Li||Li cells using (a) PVNB-SL-1M, (b) PVNB-SL-3M and (c) PVNB-SL-5M.

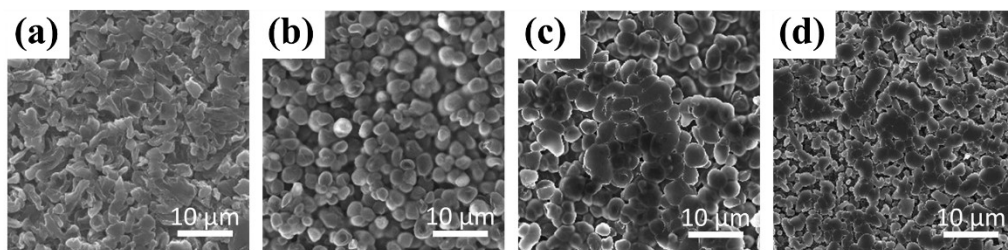

**Figure S13.** The deposition morphology and cross-sectional view of Li metal on the copper foil surface in (a) LE, (b) PVNB-SL-1M, (c) PVNB-SL-3M and (d) PVNB-SL-5M at  $0.33 \text{ mA cm}^{-2}$ ,  $2 \text{ mAh cm}^{-2}$ .

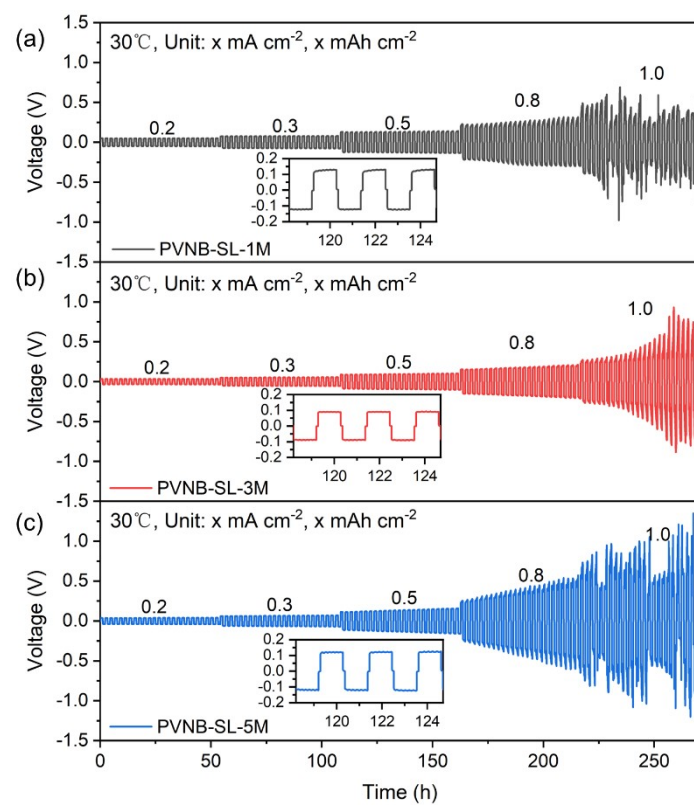

**Figure S14.** Cycling tests of Li-symmetric cells at different current densities using (a) PVNB-SL-1M, (b) PVNB-SL-3M and (c) PVNB-SL-5M.

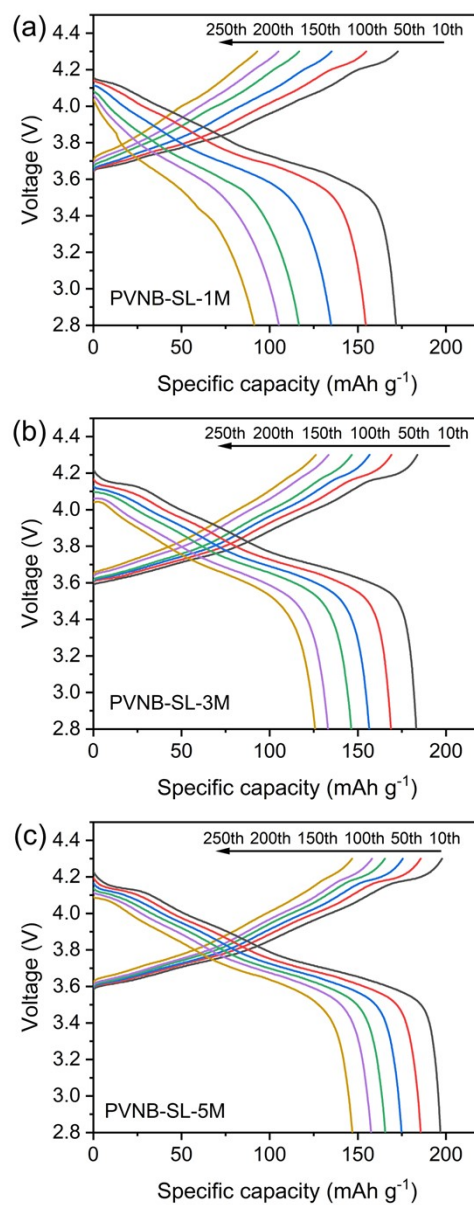

**Figure S15.** Specific capacity-voltage curves of (a) PVNB-SL-1M, (b) PVNB-SL-3M, (c) PVNB-SL-5M.



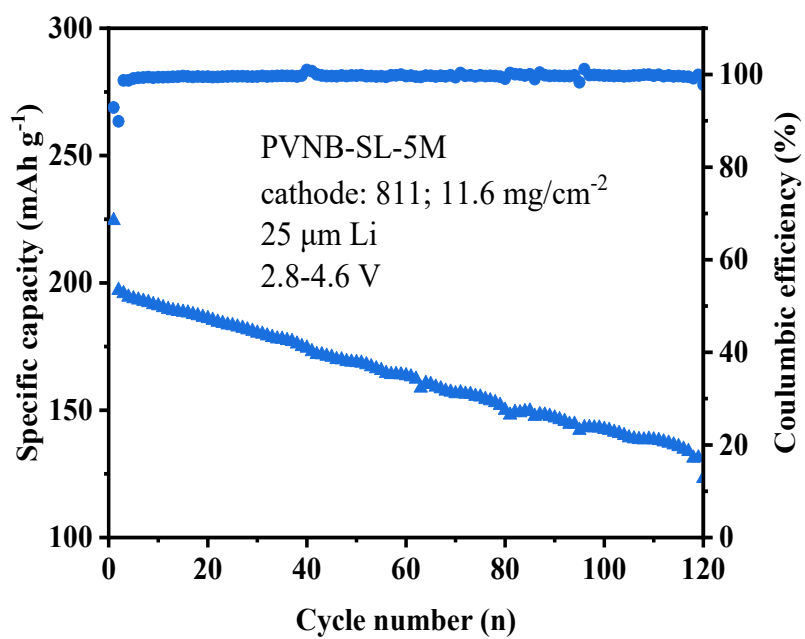

**Figure S16.** The cycling performance of NCM811||PVNB-SL-5M||Li cell using high-loading cathode and thin Li metal anode.

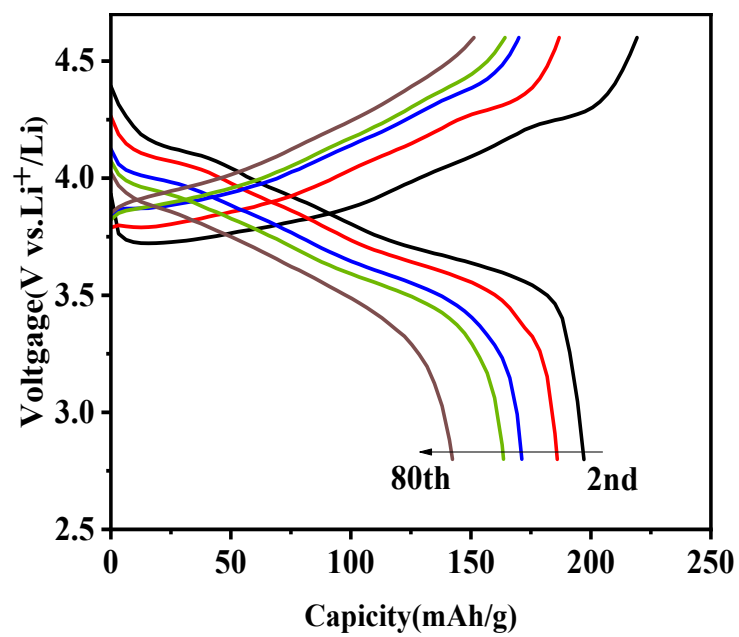

**Figure S17.** The charging-discharging curves of NCM811||PVNB-SL-5M||Li cell using high-loading cathode and thin Li metal anode.

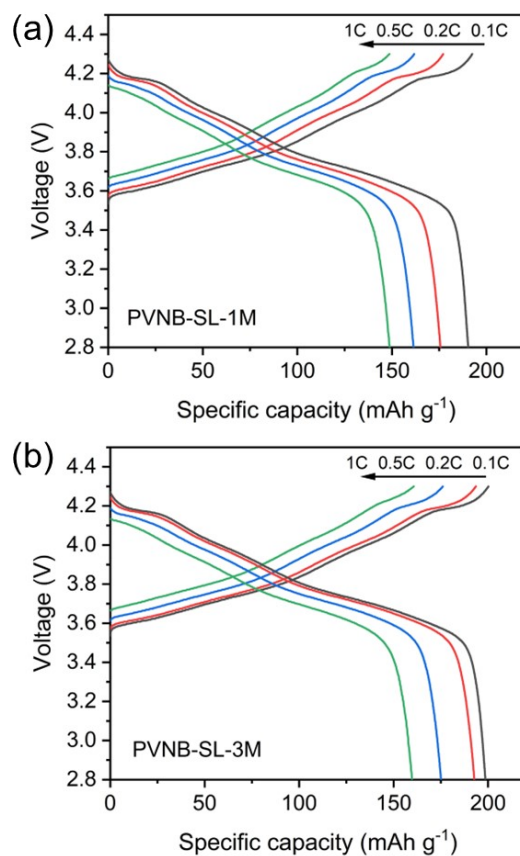

**Figure S18. The charge-discharge curves of solid-state cells at 30 °C of (a) PVNB-SL-1M, (b) PVNB-SL-3M.**

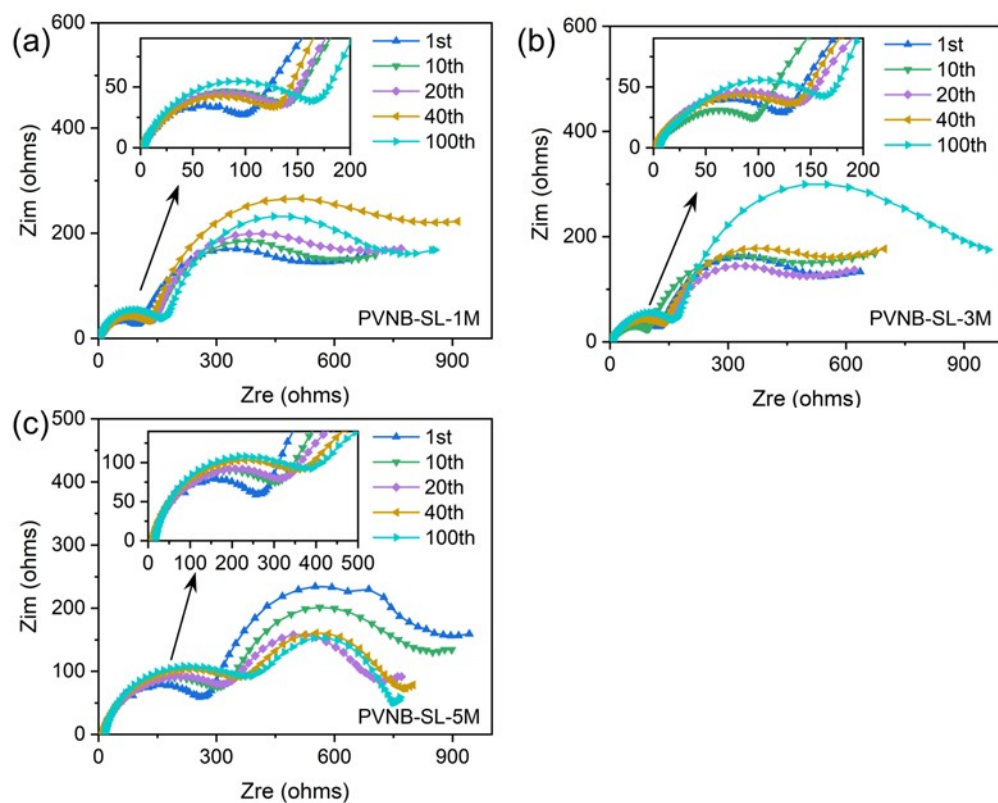

**Figure S19.** Electrochemical impedance of solid-state cells at different cycles using (a) PVNB-SL-1M, (b) PVNB-SL-3M, (c) PVNB-SL-5M.

**Table S1.** Table of electrolyte composition (units = g)

| Electrolyte  | VC  | AN  | B-PEGMA | SL  | LiTFSI | LiDFOB |
|--------------|-----|-----|---------|-----|--------|--------|
| PVNB-SL-1M   |     |     |         |     | 0.678  | 0.0377 |
| PVNB-SL-3M   |     |     |         |     | 2.034  | 0.113  |
| PVNB-SL-5M   | 1.4 | 0.6 | 0.5     | 0.5 | 3.391  | 0.189  |
| PVNB-SL-T-1M |     |     |         |     | 0.678  | --     |
| PVNB-SL-T-3M |     |     |         |     | 2.034  | --     |
| PVNB-SL-T-5M |     |     |         |     | 3.391  | --     |

**Table S2.** Li-ion transference number of PVNB-SL electrolyte with different concentrations.

| Electrolyte | $R_0$ | $R_{ss}$ | $I_0$ | $I_{ss}$ | $t_{Li}^+$ |
|-------------|-------|----------|-------|----------|------------|
| PVNB-SL-1M  | 296.6 | 303.7    | 30.42 | 28.8     | 0.71       |
| PVNB-SL-3M  | 138.1 | 142.7    | 62.83 | 59.44    | 0.82       |
| PVNB-SL-5M  | 328.5 | 354.9    | 27.86 | 25.55    | 0.84       |

**Table S3.** Comparison of cycle performance of solid-state cells.

| Electrolyte | Initial capacity<br>(mAh g <sup>-1</sup> ) | Specific capacity<br>(mAh g <sup>-1</sup> )/Capacity<br>retention (100<br>cycles) | Specific capacity<br>(mAh g <sup>-1</sup> )/Capacity<br>retention (250<br>cycles) |
|-------------|--------------------------------------------|-----------------------------------------------------------------------------------|-----------------------------------------------------------------------------------|
| PVNB        | 151.0                                      | 111.1(73.6%)                                                                      | -                                                                                 |
| PVNB-SL-1M  | 171.8                                      | 134.9 (78.5%)                                                                     | 95.0 (55.0%)                                                                      |
| PVNB-SL-3M  | 186.9                                      | 156.5 (83.7%)                                                                     | 125.7 (67.2%)                                                                     |
| PVNB-SL-5M  | 195.0                                      | 170.9 (87.7%)                                                                     | 142.2 (73.0%)                                                                     |

**Table S4.** The fitting results of the impedance spectrum (units =  $\Omega \text{ cm}^{-2}$ ).

| Cycle<br>number | PVNB-SL-1M |       |       | PVNB-SL-3M |       |       | PVNB-SL-5M |       |       |
|-----------------|------------|-------|-------|------------|-------|-------|------------|-------|-------|
|                 | $R_b$      | $R_a$ | $R_c$ | $R_b$      | $R_a$ | $R_c$ | $R_b$      | $R_a$ | $R_c$ |
| 1st             | 2.1        | 95.3  | 527.5 | 4.6        | 114.4 | 477.1 | 10.5       | 244.2 | 722.6 |
| 10th            | 2.2        | 131.6 | 536.7 | 4.2        | 92.58 | 479.7 | 11.3       | 271.6 | 641.2 |
| 20th            | 2.7<br>5   | 129.6 | 582.8 | 4.1        | 128.4 | 556.9 | 11.1       | 265.6 | 514.4 |
| 40th            | 2.1<br>6   | 121   | 777.5 | 4.5        | 150.2 | 758.1 | 11.41      | 283.8 | 541.5 |
| 100th           | 3.0<br>5   | 157.1 | 649.8 | 4.6        | 172.2 | 733.2 | 13.6       | 309   | 479.2 |
